# Supplementary material for: One dimensional Ag/Au/AgCl nanocomposites stemmed from Ag nanowires for electrocatalysis of oxygen reduction
Source: Royal Society of Chemistry journal article supplement (doi:10.1039/c2jm31128c), 2012-01-01
Supplement: c2jm31128c.pdf [file c2jm31128c.pdf]

**Supporting online materials for**

**One dimensional Ag/Au/AgCl nanocomposites stemmed from Ag nanowires for electrocatalysis of oxygen reduction**

*Jun Ho Shim,<sup>a,b</sup> Jihye Yang,<sup>a</sup> Su-jin Kim,<sup>a</sup> Chongmok Lee,<sup>a</sup> and Youngmi Lee<sup>\*,a</sup>*

<sup>†</sup>Department of Chemistry & Nano Science, Ewha Womans University, Seoul 120-750, Korea

<sup>‡</sup>Department of Chemistry, Daegu University, Gyeongsan 712-714, Korea

\*To whom all correspondence should be addressed: [youngmilee@ewha.ac.kr](mailto:youngmilee@ewha.ac.kr) (Y. Lee)

Tel: (+82) 2-3277-6652; Fax: (+82) 2-3277-2384

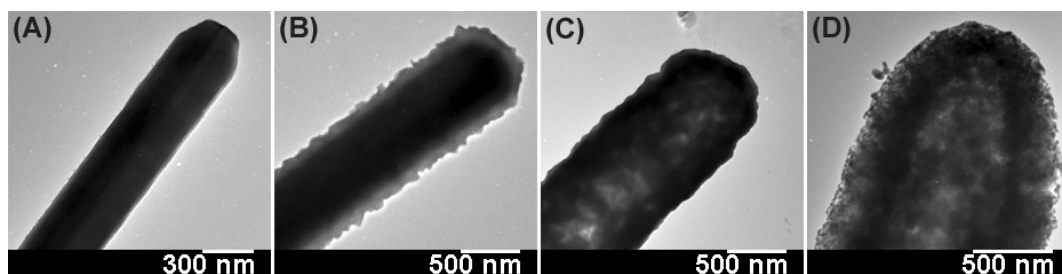

**Fig. S1.** Typical TEM images of (A) AgNWs, (B)  $\text{Ag}_{51}\text{Au}_{12}\text{AgCl}_{37}$ , (C)  $\text{Ag}_6\text{Au}_{65}\text{AgCl}_{29}$ , and (D)  $\text{Ag}_4\text{Au}_{86}\text{AgCl}_{10}$ .

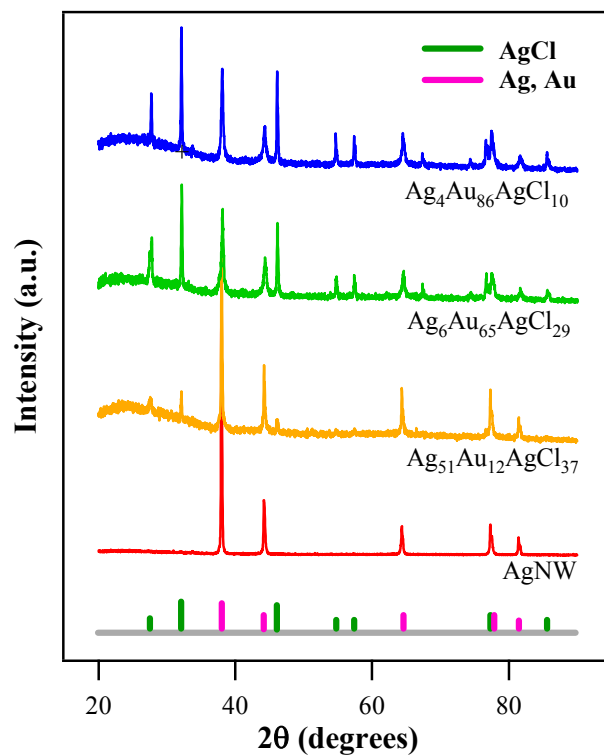

**Fig. S2.** XRD patterns of AgNWs, Ag<sub>51</sub>Au<sub>12</sub>AgCl<sub>37</sub>, Ag<sub>6</sub>Au<sub>65</sub>AgCl<sub>29</sub>, and Ag<sub>4</sub>Au<sub>86</sub>AgCl<sub>10</sub>.

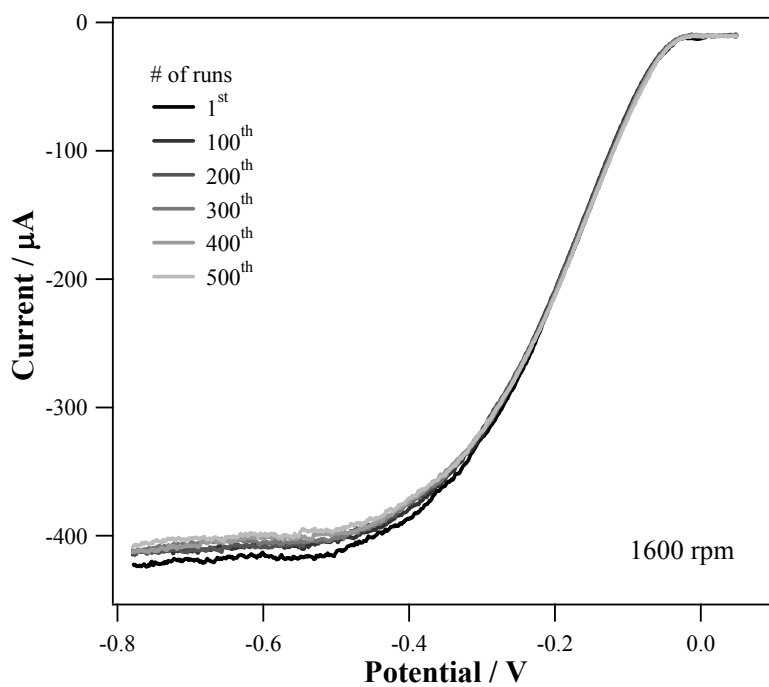

**Fig. S3.** RDE voltammograms for repetitive 500 runs obtained with  $\text{Ag}_4\text{Au}_{86}\text{AgCl}_{10}$ -modified GC electrode in an  $\text{O}_2$ -saturated 0.1 M NaOH solution at a rotation rate of 1600 rpm. All the other conditions are the same as in Fig. 4A.
